# Supplementary material for: Structural determinants for protein unfolding and translocation by the Hsp104 protein disaggregase
Source: PubMed Central journal article supplement (PMC5741831; doi:10.1042/bsr20171399), 2017-12-22
Supplement: bsr20171399_Supp1.pdf [file bsr20171399_Supp1.pdf]

## **SUPPLEMENTARY MATERIAL**

### **Structural Determinants for Protein Unfolding and Translocation by the Hsp104 Protein Disaggregase**

Jungsoon Lee<sup>1</sup>, Nuri Sung<sup>1</sup>, Lythou Yeo<sup>1</sup>, Changsoo Chang<sup>4</sup>,

Sukyeong Lee<sup>1\*</sup> and Francis T.F. Tsai<sup>1,2,3\*</sup>

<sup>1</sup>Verna and Marrs McLean Department of Biochemistry and Molecular Biology, Baylor College of Medicine, One Baylor Plaza, Houston, Texas 77030, USA; <sup>2</sup>Department of Molecular and Cellular Biology, Baylor College of Medicine, One Baylor Plaza, Houston, Texas 77030, USA; <sup>3</sup>Department of Molecular Virology and Microbiology, Baylor College of Medicine, One Baylor Plaza, Houston, Texas 77030, USA and <sup>4</sup>Structural Biology Center, Biosciences Division, Argonne National Laboratory, 9700 Cass Avenue, Argonne, IL 60439, USA.

## **SUPPLEMENTARY METHOD**

### **Analytical size-exclusion chromatography**

Purified Hsp104 and Hsp104<sub>4D</sub> (15  $\mu$ M monomer) were incubated with 5 mM ATP $\gamma$ S in refolding buffer (25 mM HEPES-KOH pH 7.5, 150 mM potassium acetate, 10 mM magnesium acetate, and 10 mM DTT) for 1 h on ice to allow self-assembly. Hsp104 and Hsp104<sub>4D</sub> oligomers were analyzed on a Superdex PC 3.2/30 column preequilibrated in 25 mM HEPES-KOH pH 7.5, 150 mM potassium acetate, 10 mM magnesium acetate, 1 mM DTT and 50  $\mu$ M ATP $\gamma$ S. Molecular weight standards (Bio-Rad) are shown.

## SUPPLEMENTARY TABLE

### Supplementary Table S1. Data collection and refinement statistics

Values in parenthesis are for the highest resolution shell.

---

|                                                            |                                                       |
|------------------------------------------------------------|-------------------------------------------------------|
| Data collection                                            |                                                       |
| Wavelength (Å)                                             | 1.0396                                                |
| Temperature (K)                                            | 93                                                    |
| Space group                                                | <i>P</i> 2 <sub>1</sub> 2 <sub>1</sub> 2 <sub>1</sub> |
| <i>a</i> , <i>b</i> , <i>c</i> (Å)                         | 66.56, 75.82, 235.65                                  |
| $\alpha$ , $\beta$ , $\gamma$ (°)                          | 90.0, 90.0, 90.0                                      |
| Resolution range (Å)                                       | 49.04 - 2.59 (2.68 - 2.59)                            |
| Total No. of reflections                                   | 238,759                                               |
| No. of unique reflections                                  | 36,873                                                |
| Completeness (%)                                           | 97.3 (80.3)                                           |
| Multiplicity                                               | 6.5 (3.9)                                             |
| $\langle I/\sigma(I) \rangle$                              | 16.5                                                  |
| $R_{\text{sym}}^{\S}$                                      | 0.058                                                 |
| Overall <i>B</i> factor from Wilson plot (Å <sup>2</sup> ) | 64.54                                                 |
| Structure refinement                                       |                                                       |
| Resolution range (Å)                                       | 46.04 - 2.60 (2.65 - 2.60)                            |
| Completeness (%)                                           | 97.76                                                 |
| No. of reflections, working/test set                       | 36,797 / 2,587                                        |
| Final $R_{\text{cryst}}^{\ddagger}$                        | 0.2408 (0.3391)                                       |
| Final $R_{\text{free}}^{\ddagger}$                         | 0.2859 (0.4437)                                       |

---

|                                     |       |
|-------------------------------------|-------|
| No. of molecules in asymmetric unit | 3     |
| No. of non-H atoms                  |       |
| Protein                             | 7,864 |
| Water                               | 24    |
| Total                               | 7,888 |
| R.m.s. deviations                   |       |
| Bonds (Å)                           | 0.002 |
| Angles (°)                          | 0.558 |
| Average B factors (Å <sup>2</sup> ) |       |
| Protein                             | 97.85 |
| Water                               | 71.89 |
| All atoms                           | 97.77 |
| Ramachandran plot                   |       |
| Most favoured (%)                   | 96.48 |
| Allowed (%)                         | 3.12  |
| Outliers (%)                        | 0.39  |

<sup>§</sup> $R_{\text{sym}} = \frac{\sum_{hkl} \sum_i |I_i(hkl) - \langle I(hkl) \rangle|}{\sum_{hkl} \sum_i I_i(hkl)}$ , where  $\langle I(hkl) \rangle$  is the mean of  $i$  observations  $I_i(hkl)$  of reflection  $hkl$ .

<sup>¶</sup> $R_{\text{cryst}}$  and  $R_{\text{free}} = \frac{\sum_{hkl} ||F_{\text{obs}}| - |F_{\text{calc}}||}{\sum_{hkl} |F_{\text{obs}}|}$ , where  $F_{\text{obs}}$  and  $F_{\text{calc}}$  are the observed and calculated structure factors, respectively, calculated for recorded data ( $R_{\text{cryst}}$ ) and for 7.03 % of the data omitted in refinement ( $R_{\text{free}}$ ).

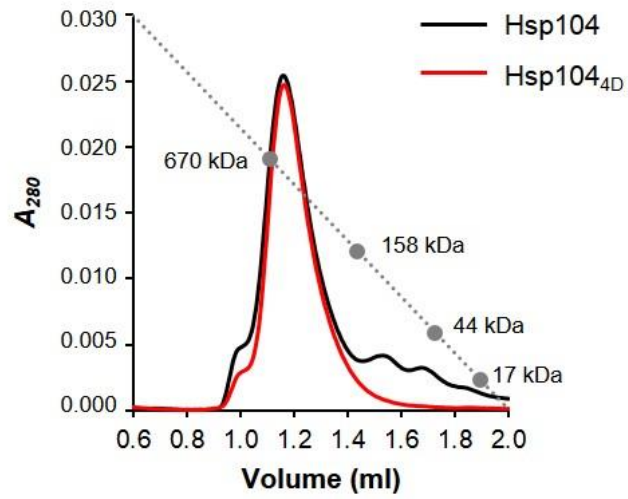

**Supplementary Figure S1.** Analytical size-exclusion chromatograms of Hsp104 and Hsp104<sub>4D</sub> in the presence of nucleotide. Both Hsp104 (black) and Hsp104<sub>4D</sub> (red) form hexamer assemblies with ATP $\gamma$ S. Molecular weight standards are shown.
